# Supplementary material
Source: MDPI journal article supplement (https://www.mdpi.com/2304-6740/8/5/32)
Supplement: s1 [file s1]

# Supplementary Materials: Rare Nuclearities in Ni(II) Cluster Chemistry: An Unprecedented {Ni<sub>12</sub>} Nanosized Cage from the Use of *N*-Naphthalidene-2-Amino-5-Chlorobenzoic Acid

Panagiota S. Perlepe, Konstantinos N. Pantelis, Luís Cunha-Silva, Vlasoula Bekiari, Albert Escuer and Theodoros C. Stamatatos

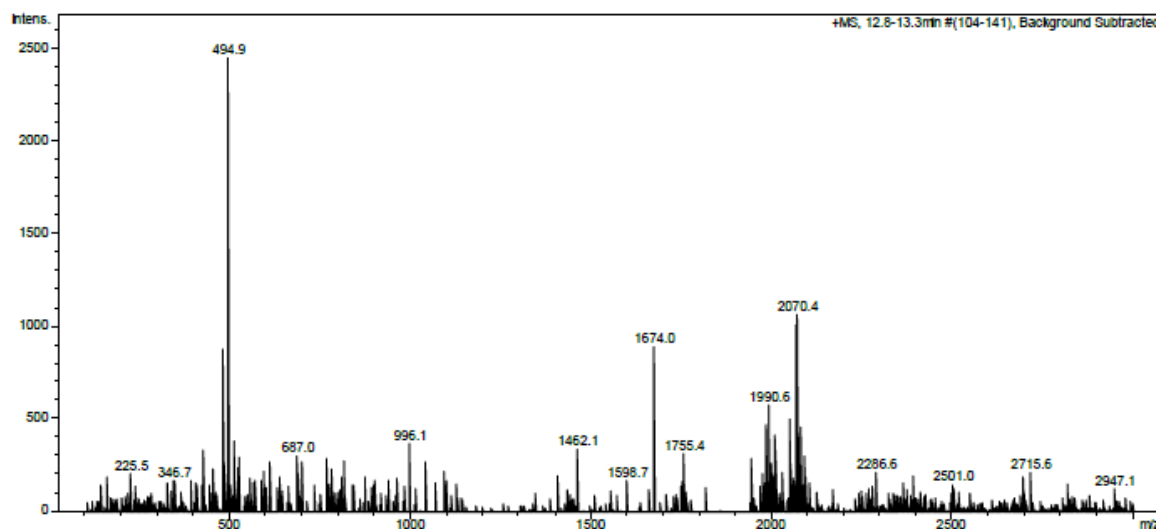

**Figure S1.** Positive ion ES mass spectrum of 1 in a solvent mixture of MeCN/CH<sub>2</sub>Cl<sub>2</sub>.
